# Supplementary material for: Tropospheric NO 2 retrieval algorithm for geostationary satellite instruments: applications to GEMS
Source: Copernicus journal article supplement (doi:10.5194/amt-17-6163-2024), 2024-10-23
Supplement: Supplementary file 1 [file amt-17-6163-2024-supplement.pdf]

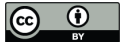

*Supplement of*

## **Tropospheric NO<sub>2</sub> retrieval algorithm for geostationary satellite instruments: applications to GEMS**

**Sora Seo et al.**

*Correspondence to:* Sora Seo (sora.seo@dlr.de)

The copyright of individual parts of the supplement might differ from the article licence.

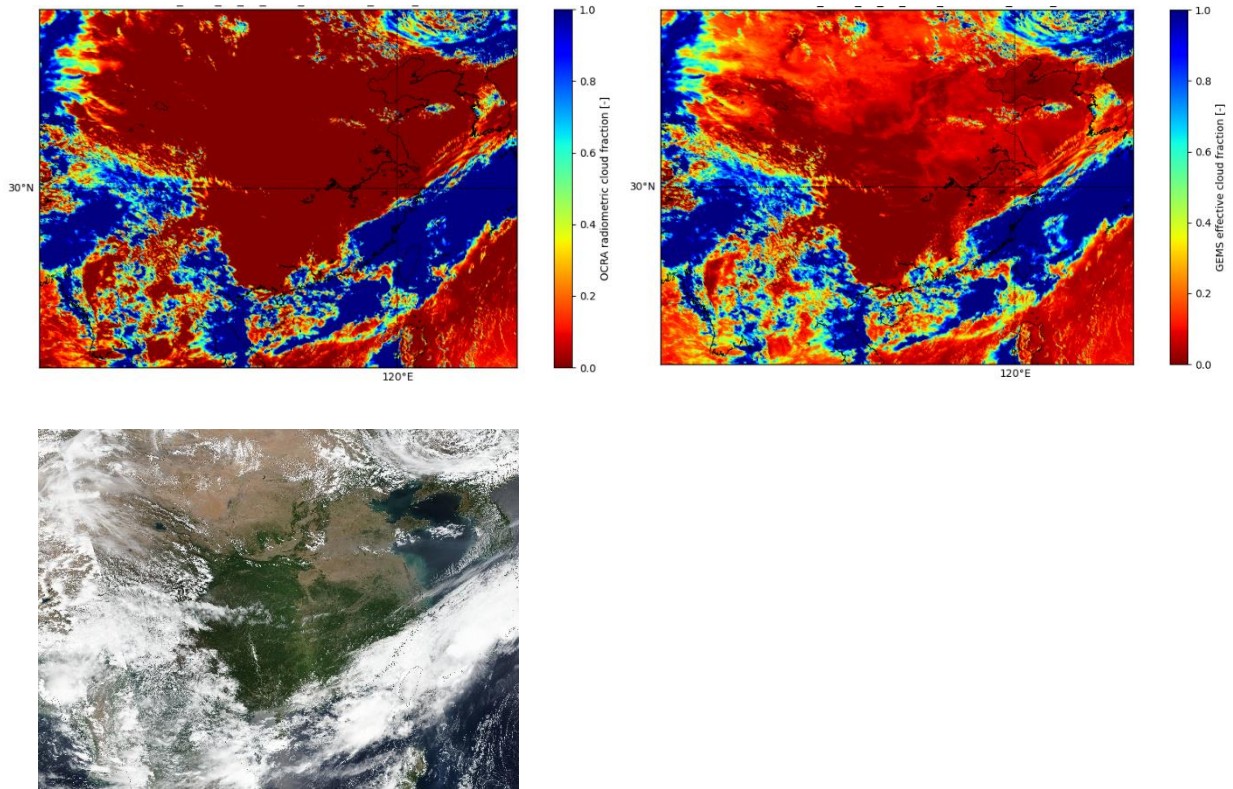

Figure S1. Zoom into a clear-sky region over China on the 2:45 UTC scan on 5 June 2021 for the OCRA cloud fraction (top left) and the operational GEMS v2.0 L2 cloud fraction (top right). The bottom left panel shows a true-colour RGB from VIIRS, taken from NASA Worldview. Note that the bright surface structures appearing in the northern part of the RGB true colour image seem to be translated into the operational GEMS cloud fraction product.
